# Supplementary material for: visGReMLIN: graph mining-based detection and visualization of conserved motifs at 3D protein-ligand interface at the atomic level
Source: PubMed Central journal article supplement (PMC7068867; doi:10.1186/s12859-020-3347-7), 2020-03-11
Supplement: 12859_2020_3347_MOESM1_ESM.pdf [file 12859_2020_3347_MOESM1_ESM.pdf]

# VISGREMLIN: A GRAPH MINING BASED DETECTION AND VISUALIZATION OF CONSERVED MOTIFS IN 3D PROTEIN-LIGAND INTERFACE AT THE ATOMIC LEVEL - SUPPLEMENTARY MATERIAL

## 1 METHODS

### New Project

**\*Enter the project name:**

**Enter the project description:**

**Enter the cutoff for each type of interaction:**

**Aromatic stacking:**   1.50 to 3.50 Ångstroms

**Hydrogen bond:**   2.00 to 3.00 Ångstroms

**Hydrophobic:**   2.00 to 3.80 Ångstroms

**Repulsive:**   2.00 to 6.00 Ångstroms

**Salt bridge:**   2.00 to 6.00 Ångstroms

**Enter the clustering method and the evaluation metric:**

**Clustering method:**  **Evaluation metric:**

Download Files directly from the Protein Data Bank Repository

**Enter reference PDB and chain:**

**Searching in RCSB PDB for sequence identity of the reference protein:**

**Alignment method:**  **Identity (% , only integer):**

**Or enter the PDB(s) that will be analyzed manually:**

**Or Upload your own PDB Files (Max. 50MB)**

*\*Required fields*

**Fig. 1.** Starting a new project in visGreMLIN. There are 3 options for the user to provide the dataset of protein-ligand complexes similar to the reference PDB id to be analyzed: **a)** Let our tool to automatically search on PDB for these complexes, by selecting an alignment method and an identity percentage; **b)** Enter a dataset of previously selected complexes manually (type or copy and paste); **c)** Upload users own complexes in PDB format (structures that are not deposited in PDB).

Table 1: Atom types used in visGReMLIN.

| Molecule | Atom name | Hydrophobic | Aromatic | Positive | Negative | Donor | Acceptor |
|----------|-----------|-------------|----------|----------|----------|-------|----------|
| ALA      | N         |             |          |          |          | X     |          |
| ALA      | CA        |             |          |          |          |       |          |
| ALA      | C         |             |          |          |          |       |          |
| ALA      | O         |             |          |          |          |       | X        |
| ALA      | CB        | X           |          |          |          |       |          |
| ARG      | N         |             |          |          |          | X     |          |
| ARG      | CA        |             |          |          |          |       |          |
| ARG      | C         |             |          |          |          |       |          |
| ARG      | O         |             |          |          |          |       | X        |
| ARG      | CB        | X           |          |          |          |       |          |
| ARG      | CG        | X           |          |          |          |       |          |
| ARG      | CD        |             |          |          |          |       |          |
| ARG      | NE        |             |          | X        |          | X     |          |
| ARG      | CZ        |             |          | X        |          |       |          |
| ARG      | NH1       |             |          | X        |          | X     |          |
| ARG      | NH2       |             |          | X        |          | X     |          |
| ASN      | N         |             |          |          |          | X     |          |
| ASN      | CA        |             |          |          |          |       |          |
| ASN      | C         |             |          |          |          |       |          |
| ASN      | O         |             |          |          |          |       | X        |
| ASN      | CB        | X           |          |          |          |       |          |
| ASN      | CG        |             |          |          |          |       |          |
| ASN      | OD1       |             |          |          |          |       | X        |
| ASN      | ND2       |             |          |          |          | X     |          |
| ASP      | N         |             |          |          |          | X     |          |
| ASP      | CA        |             |          |          |          |       |          |
| ASP      | C         |             |          |          |          |       |          |
| ASP      | O         |             |          |          |          |       | X        |
| ASP      | CB        | X           |          |          |          |       |          |
| ASP      | CG        |             |          |          |          |       |          |
| ASP      | OD1       |             |          |          | X        |       | X        |
| ASP      | OD2       |             |          |          | X        |       | X        |
| CYS      | N         |             |          |          |          | X     |          |
| CYS      | CA        |             |          |          |          |       |          |
| CYS      | C         |             |          |          |          |       |          |
| CYS      | O         |             |          |          |          |       | X        |
| CYS      | CB        | X           |          |          |          |       |          |
| CYS      | SG        |             |          |          |          | X     | X        |
| GLN      | N         |             |          |          |          | X     |          |
| GLN      | CA        |             |          |          |          |       |          |
| GLN      | C         |             |          |          |          |       |          |
| GLN      | O         |             |          |          |          |       | X        |
| GLN      | CB        | X           |          |          |          |       |          |
| GLN      | CG        | X           |          |          |          |       |          |
| GLN      | CD        |             |          |          |          |       |          |
| GLN      | OE1       |             |          |          |          |       | X        |
| GLN      | NE2       |             |          |          |          | X     |          |
| GLU      | N         |             |          |          |          | X     |          |
| GLU      | CA        |             |          |          |          |       |          |
| GLU      | C         |             |          |          |          |       |          |
| GLU      | O         |             |          |          |          |       | X        |
| GLU      | CB        | X           |          |          |          |       |          |
| GLU      | CG        | X           |          |          |          |       |          |
| GLU      | CD        |             |          |          |          |       |          |
| GLU      | OE1       |             |          |          | X        |       | X        |

Table 1 continued from previous page

| Molecule | Atom name | Hydrophobic | Aromatic | Positive | Negative | Donor | Acceptor |
|----------|-----------|-------------|----------|----------|----------|-------|----------|
| GLU      | OE2       |             |          |          | X        |       | X        |
| GLY      | N         |             |          |          |          | X     |          |
| GLY      | CA        |             |          |          |          |       |          |
| GLY      | C         |             |          |          |          |       |          |
| GLY      | O         |             |          |          |          |       | X        |
| HIS      | N         |             |          |          |          | X     |          |
| HIS      | CA        |             |          |          |          |       |          |
| HIS      | C         |             |          |          |          |       |          |
| HIS      | O         |             |          |          |          |       | X        |
| HIS      | CB        | X           |          |          |          |       |          |
| HIS      | CG        |             | X        |          |          |       |          |
| HIS      | ND1       |             | X        | X        |          | X     | X        |
| HIS      | CD2       |             | X        |          |          |       |          |
| HIS      | CE1       |             | X        |          |          |       |          |
| HIS      | NE2       |             | X        | X        |          | X     | X        |
| ILE      | N         |             |          |          |          | X     |          |
| ILE      | CA        |             |          |          |          |       |          |
| ILE      | C         |             |          |          |          |       |          |
| ILE      | O         |             |          |          |          |       | X        |
| ILE      | CB        | X           |          |          |          |       |          |
| ILE      | CG1       | X           |          |          |          |       |          |
| ILE      | CG2       | X           |          |          |          |       |          |
| ILE      | CD1       | X           |          |          |          |       |          |
| LEU      | N         |             |          |          |          | X     |          |
| LEU      | CA        |             |          |          |          |       |          |
| LEU      | C         |             |          |          |          |       |          |
| LEU      | O         |             |          |          |          |       | X        |
| LEU      | CB        | X           |          |          |          |       |          |
| LEU      | CG        | X           |          |          |          |       |          |
| LEU      | CD1       | X           |          |          |          |       |          |
| LEU      | CD2       | X           |          |          |          |       |          |
| LYS      | N         |             |          |          |          | X     |          |
| LYS      | CA        |             |          |          |          |       |          |
| LYS      | C         |             |          |          |          |       |          |
| LYS      | O         |             |          |          |          |       | X        |
| LYS      | CB        | X           |          |          |          |       |          |
| LYS      | CG        | X           |          |          |          |       |          |
| LYS      | CD        | X           |          |          |          |       |          |
| LYS      | CE        |             |          |          |          |       |          |
| LYS      | NZ        |             |          | X        |          | X     |          |
| MET      | N         |             |          |          |          | X     |          |
| MET      | CA        |             |          |          |          |       |          |
| MET      | C         |             |          |          |          |       |          |
| MET      | O         |             |          |          |          |       | X        |
| MET      | CB        | X           |          |          |          |       |          |
| MET      | CG        | X           |          |          |          |       |          |
| MET      | SD        |             |          |          |          |       | X        |
| MET      | CE        | X           |          |          |          |       |          |
| PHE      | N         |             |          |          |          | X     |          |
| PHE      | CA        |             |          |          |          |       |          |
| PHE      | C         |             |          |          |          |       |          |
| PHE      | O         |             |          |          |          |       | X        |
| PHE      | CB        | X           |          |          |          |       |          |
| PHE      | CG        | X           | X        |          |          |       |          |
| PHE      | CD1       | X           | X        |          |          |       |          |
| PHE      | CD2       | X           | X        |          |          |       |          |

Table 1 continued from previous page

| Molecule | Atom name | Hydrophobic | Aromatic | Positive | Negative | Donor | Acceptor |
|----------|-----------|-------------|----------|----------|----------|-------|----------|
| PHE      | CE1       | X           | X        |          |          |       |          |
| PHE      | CE2       | X           | X        |          |          |       |          |
| PHE      | CZ        | X           | X        |          |          |       |          |
| PRO      | N         |             |          |          |          |       |          |
| PRO      | CA        |             |          |          |          |       |          |
| PRO      | C         |             |          |          |          |       |          |
| PRO      | O         |             |          |          |          |       | X        |
| PRO      | CB        | X           |          |          |          |       |          |
| PRO      | CG        | X           |          |          |          |       |          |
| PRO      | CD        |             |          |          |          |       |          |
| SER      | N         |             |          |          |          | X     |          |
| SER      | CA        |             |          |          |          |       |          |
| SER      | C         |             |          |          |          |       |          |
| SER      | O         |             |          |          |          |       | X        |
| SER      | CB        |             |          |          |          |       |          |
| SER      | OG        |             |          |          |          | X     | X        |
| THR      | N         |             |          |          |          | X     |          |
| THR      | CA        |             |          |          |          |       |          |
| THR      | C         |             |          |          |          |       |          |
| THR      | O         |             |          |          |          |       | X        |
| THR      | CB        |             |          |          |          |       |          |
| THR      | OG1       |             |          |          |          | X     | X        |
| THR      | CG2       | X           |          |          |          |       |          |
| TRP      | N         |             |          |          |          | X     |          |
| TRP      | CA        |             |          |          |          |       |          |
| TRP      | C         |             |          |          |          |       |          |
| TRP      | O         |             |          |          |          |       | X        |
| TRP      | CB        | X           |          |          |          |       |          |
| TRP      | CG        | X           | X        |          |          |       |          |
| TRP      | CD1       |             | X        |          |          |       |          |
| TRP      | CD2       | X           | X        |          |          |       |          |
| TRP      | NE1       |             | X        |          |          | X     |          |
| TRP      | CE2       |             | X        |          |          |       |          |
| TRP      | CE3       | X           | X        |          |          |       |          |
| TRP      | CZ2       | X           | X        |          |          |       |          |
| TRP      | CZ3       | X           | X        |          |          |       |          |
| TRP      | CH2       | X           | X        |          |          |       |          |
| TYR      | N         |             |          |          |          | X     |          |
| TYR      | CA        |             |          |          |          |       |          |
| TYR      | C         |             |          |          |          |       |          |
| TYR      | O         |             |          |          |          |       | X        |
| TYR      | CB        | X           |          |          |          |       |          |
| TYR      | CG        | X           | X        |          |          |       |          |
| TYR      | CD1       | X           | X        |          |          |       |          |
| TYR      | CD2       | X           | X        |          |          |       |          |
| TYR      | CE1       | X           | X        |          |          |       |          |
| TYR      | CE2       | X           | X        |          |          |       |          |
| TYR      | CZ        |             | X        |          |          |       |          |
| TYR      | OH        |             |          |          |          | X     | X        |
| VAL      | N         |             |          |          |          | X     |          |
| VAL      | CA        |             |          |          |          |       |          |
| VAL      | C         |             |          |          |          |       |          |
| VAL      | O         |             |          |          |          |       | X        |
| VAL      | CB        | X           |          |          |          |       |          |
| VAL      | CG1       | X           |          |          |          |       |          |
| VAL      | CG2       | X           |          |          |          |       |          |

Dataset details

Search:

| Group | PDB ids                                                                                                                        |
|-------|--------------------------------------------------------------------------------------------------------------------------------|
| 1     | 3 (1YSK:A), 24 (3ZLR:A)                                                                                                        |
| 2     | 13 (3SP7:A)                                                                                                                    |
| 3     | 5 (2YXJ:A)                                                                                                                     |
| 4     | 2 (1YSK:A), 17 (3ZLN:A)                                                                                                        |
| 5     | 9 (3SP7:A), 10 (3SP7:A)                                                                                                        |
| 6     | 1 (1YSK:A)                                                                                                                     |
| 7     | 14 (3SP7:A)                                                                                                                    |
| 8     | 0 (1YSK:A), 4 (1YSK:A), 11 (3SP7:A), 12 (3SP7:A), 18 (3ZLN:A), 19 (3ZLN:A), 21 (3ZLN:A), 22 (3ZLR:A), 23 (3ZLR:A), 27 (3ZLR:A) |
| 9     | 26 (3ZLR:A)                                                                                                                    |
| 10    | 6 (2YXJ:A)                                                                                                                     |
| 11    | 15 (3SP7:A), 16 (3SP7:A), 25 (3ZLR:A)                                                                                          |
| 12    | 7 (2YXJ:A)                                                                                                                     |
| 14    | 8 (3SP7:A), 20 (3ZLN:A), 28 (3ZLR:A)                                                                                           |

**Fig. 2.** The Dataset Details section shows the results of the clustering of the connected graphs that represent the interactions between a given protein and ligand.

Graph patterns table srBCL

Options

Table type: Grouping columns Simple table

Filter by group: All

Filter by minimum pattern size:

Filter by minimum occurrences:

Grouping columns

Search:

| Group    | Pattern size | Occurrences  |
|----------|--------------|--------------|
| Group: 8 | 3            | Support: 0.1 |
| Group: 8 | 3            | Support: 0.2 |
| Group: 8 | 3            | Support: 0.3 |
| Group: 8 | 3            | Support: 0.1 |
| Group: 8 | 3            | Support: 0.2 |
| Group: 8 | 3            | Support: 0.3 |

**Fig. 3.** The Graph patterns table page shows a summary of the patterns found for each group and support.

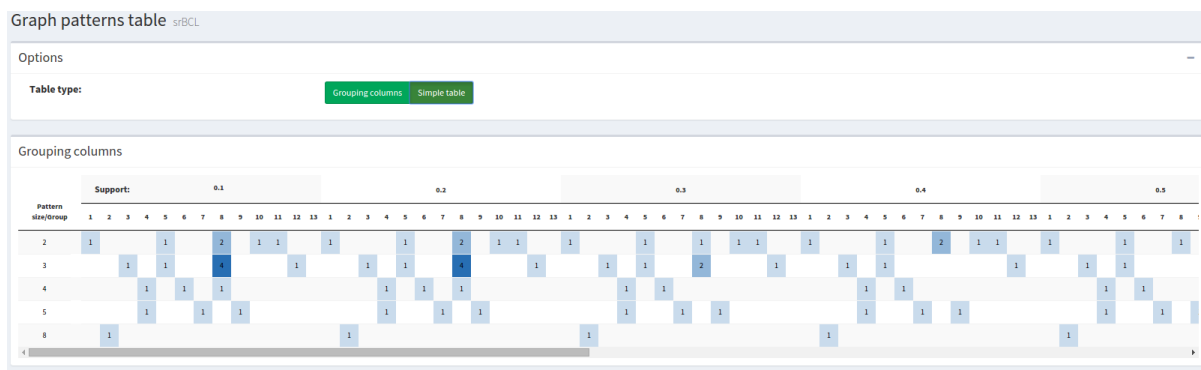

Fig. 4. The simple table shows the number of times that a pattern of a given group, support and size appears.

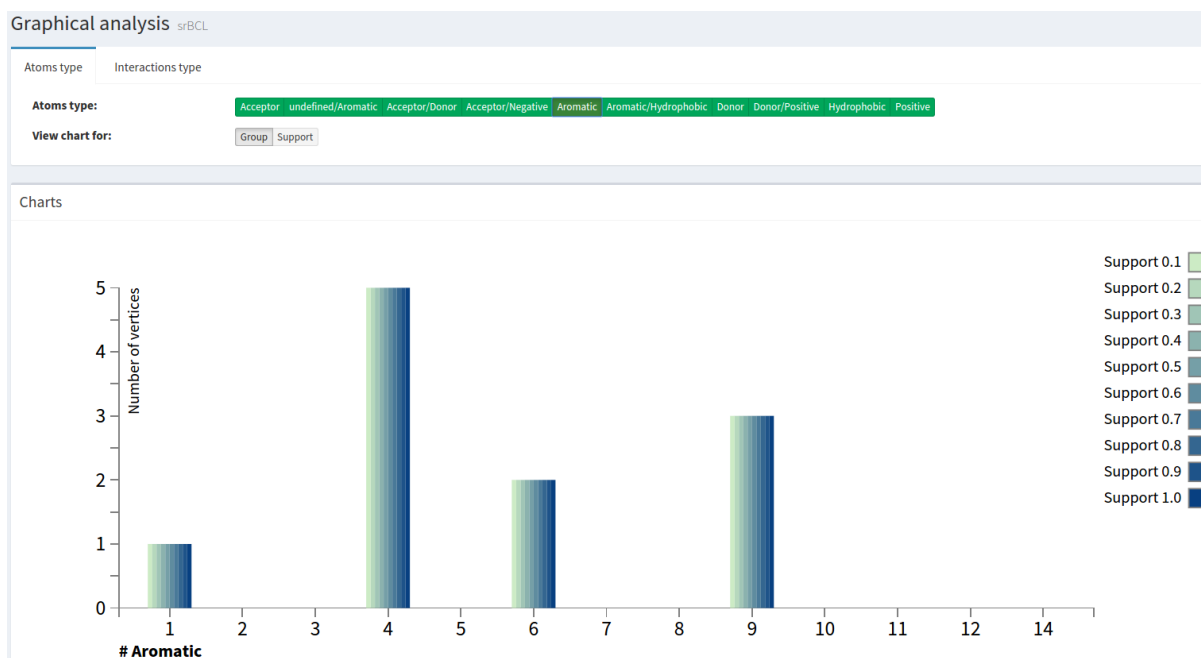

Fig. 5. Summary of motifs extracted from PLI graphs.

## 2 RESULTS AND DISCUSSION

| Group | PDB ids                                                                                                                                                                                                                                                                                                                                                                                                                                                                                                                                                                                                                                                                                                                                                                                                                                                                                                                                                                                                                                                                                                                                                                                                                                                                                                                                                                |
|-------|------------------------------------------------------------------------------------------------------------------------------------------------------------------------------------------------------------------------------------------------------------------------------------------------------------------------------------------------------------------------------------------------------------------------------------------------------------------------------------------------------------------------------------------------------------------------------------------------------------------------------------------------------------------------------------------------------------------------------------------------------------------------------------------------------------------------------------------------------------------------------------------------------------------------------------------------------------------------------------------------------------------------------------------------------------------------------------------------------------------------------------------------------------------------------------------------------------------------------------------------------------------------------------------------------------------------------------------------------------------------|
| 0     | 0 (3QL8:A), 3 (3QQF:A), 6 (3QQG:A), 8 (3QQH:A), 10 (3QQJ:A), 12 (3QQK:A), 14 (3QQK:A), 33 (3QTQ:A), 36 (3QTQ:A), 37 (3QTR:A), 39 (3QTR:A), 41 (3QTS:A), 42 (3QTS:A), 45 (3QTU:A), 47 (3QTU:A), 48 (3QTW:A), 50 (3QTW:A), 52 (3QTX:A), 53 (3QTX:A), 55 (3QTX:A), 56 (3QTX:A), 57 (3QU0:A), 58 (3QU0:A), 61 (3QWJ:A), 67 (3QWK:A), 73 (3QX2:A), 77 (3QX4:A), 80 (3QXO:A), 84 (3QXP:A), 85 (3QXP:A), 86 (3QZF:A), 88 (3QZF:A), 91 (3QZG:A), 99 (3QZI:A), 107 (3R1S:A), 109 (3R1Y:A), 116 (3R28:A), 121 (3R6X:A), 124 (3R71:A), 127 (3R73:A), 130 (3R7E:A), 139 (3R7U:A), 142 (3R7V:A), 145 (3R7Y:A), 161 (3R8U:A), 163 (3R8U:A), 166 (3R8V:A), 168 (3R8V:A), 170 (3R8Z:A), 171 (3R8Z:A), 175 (3R9D:A), 176 (3R9D:A), 178 (3R9H:A), 179 (3R9H:A), 184 (3R9N:A), 185 (3R9N:A), 187 (3R9O:A), 188 (3R9O:A), 193 (3RAH:A), 194 (3RAH:A), 199 (3RAI:A), 204 (3RAK:A), 205 (3RAK:A), 207 (3RAL:A), 208 (3RAL:A), 210 (3RJC:A), 211 (3RJC:A), 212 (3RK5:A), 214 (3RK5:A), 215 (3RK7:A), 216 (3RK7:A), 217 (3RK9:A), 219 (3RK9:A), 221 (3RKB:A), 222 (3RKB:A), 231 (3RMF:A), 232 (3RMF:A), 233 (3RNI:A), 234 (3RNI:A), 242 (3RPO:A), 246 (3RPR:A), 248 (3RPR:A), 250 (3RPV:A), 252 (3RPV:A), 254 (3RPV:A), 255 (3RPV:A), 256 (3RPV:A), 259 (3RZB:A), 260 (3RZB:A), 263 (3S00:A), 265 (3S00:A), 266 (3S00:A), 268 (3S00:A), 270 (3S1H:A), 271 (3S1H:A), 274 (3SQQ:A), 275 (3SQQ:A) |
| 1     | 2 (3QQF:A), 5 (3QQF:A), 11 (3QQJ:A), 17 (3QQL:A), 22 (3QRT:A), 24 (3QRT:A), 26 (3QRU:A), 40 (3QTS:A), 49 (3QTW:A), 60 (3QWJ:A), 63 (3QWJ:A), 64 (3QWK:A), 66 (3QWK:A), 68 (3QX2:A), 69 (3QX2:A), 72 (3QX2:A), 74 (3QX4:A), 75 (3QX4:A), 79 (3QXO:A), 82 (3QXO:A), 92 (3QZH:A), 96 (3QZH:A), 98 (3QZI:A), 101 (3QZI:A), 102 (3R1Q:A), 103 (3R1Q:A), 105 (3R1S:A), 106 (3R1S:A), 111 (3R1Y:A), 112 (3R28:A), 113 (3R28:A), 118 (3R6X:A), 119 (3R6X:A), 122 (3R71:A), 123 (3R71:A), 128 (3R73:A), 131 (3R7E:A), 132 (3R71:A), 133 (3R71:A), 135 (3R71:A), 137 (3R7U:A), 138 (3R7U:A), 140 (3R7U:A), 141 (3R7V:A), 144 (3R7Y:A), 148 (3R8L:A), 153 (3R8M:A), 157 (3R8P:A), 160 (3R8U:A), 165 (3R8V:A), 182 (3R9N:A), 191 (3RAH:A), 195 (3RAI:A), 197 (3RAI:A), 201 (3RAI:A), 203 (3RAK:A), 206 (3RAL:A), 213 (3RK5:A), 224 (3RM6:A), 225 (3RM6:A), 226 (3RM6:A), 235 (3ROY:A), 237 (3ROY:A), 239 (3RPO:A), 241 (3RPO:A), 244 (3RPR:A), 253 (3RPV:A), 262 (3S00:A), 272 (3S1H:A), 273 (3SQQ:A)                                                                                                                                                                                                                                                                                                                                                                              |
| 2     | 149 (3R8L:A), 159 (3R8P:A), 169 (3R8V:A)                                                                                                                                                                                                                                                                                                                                                                                                                                                                                                                                                                                                                                                                                                                                                                                                                                                                                                                                                                                                                                                                                                                                                                                                                                                                                                                               |
| 3     | 4 (3QQF:A), 15 (3QQL:A), 62 (3QWJ:A), 65 (3QWK:A), 70 (3QX2:A), 78 (3QX4:A), 81 (3QXO:A), 94 (3QZH:A), 100 (3QZI:A), 104 (3R1Q:A), 108 (3R1S:A), 110 (3R1Y:A), 117 (3R28:A), 120 (3R6X:A), 125 (3R71:A), 126 (3R73:A), 129 (3R7E:A), 134 (3R71:A), 136 (3R7U:A), 143 (3R7V:A), 146 (3R7Y:A), 147 (3R83:A), 154 (3R8M:A), 173 (3R8Z:A), 200 (3RAI:A), 227 (3RM6:A), 229 (3RM7:A), 236 (3ROY:A), 238 (3ROY:A), 243 (3RPO:A)                                                                                                                                                                                                                                                                                                                                                                                                                                                                                                                                                                                                                                                                                                                                                                                                                                                                                                                                              |
| 4     | 1 (3QL8:A), 7 (3QQG:A), 9 (3QQH:A), 23 (3QRT:A), 44 (3QTS:A), 46 (3QTU:A), 51 (3QTX:A), 180 (3R9H:A), 209 (3RAL:A), 230 (3RMF:A), 249 (3RPR:A), 251 (3RPV:A), 257 (3RPY:A)                                                                                                                                                                                                                                                                                                                                                                                                                                                                                                                                                                                                                                                                                                                                                                                                                                                                                                                                                                                                                                                                                                                                                                                             |
| 5     | 29 (3QRU:A), 115 (3R28:A), 183 (3R9N:A), 192 (3RAH:A), 220 (3RKB:A)                                                                                                                                                                                                                                                                                                                                                                                                                                                                                                                                                                                                                                                                                                                                                                                                                                                                                                                                                                                                                                                                                                                                                                                                                                                                                                    |
| 6     | 13 (3QQK:A), 16 (3QQL:A), 18 (3QQL:A), 20 (3QRT:A), 21 (3QRT:A), 27 (3QRU:A), 28 (3QRU:A), 30 (3QRU:A), 31 (3QRU:A), 32 (3QRU:A), 34 (3QTQ:A), 35 (3QTQ:A), 38 (3QTR:A), 43 (3QTS:A), 59 (3QWJ:A), 71 (3QX2:A), 76 (3QX4:A), 83 (3QXO:A), 89 (3QZG:A), 95 (3QZH:A), 97 (3QZI:A), 114 (3R28:A), 151 (3R8L:A), 152 (3R8L:A), 155 (3R8P:A), 156 (3R8P:A), 164 (3R8U:A), 167 (3R8V:A), 172 (3R8Z:A), 181 (3R9N:A), 189 (3R9O:A), 190 (3RAH:A), 196 (3RAI:A), 198 (3RAI:A), 202 (3RAI:A), 218 (3RK9:A), 223 (3RKB:A), 228 (3RM6:A), 240 (3RPO:A), 247 (3RPR:A), 258 (3RZB:A), 264 (3S00:A), 267 (3S00:A), 269 (3S00:A)                                                                                                                                                                                                                                                                                                                                                                                                                                                                                                                                                                                                                                                                                                                                                      |
| 7     | 87 (3QZF:A), 90 (3QZG:A), 245 (3RPR:A)                                                                                                                                                                                                                                                                                                                                                                                                                                                                                                                                                                                                                                                                                                                                                                                                                                                                                                                                                                                                                                                                                                                                                                                                                                                                                                                                 |
| 8     | 162 (3R8U:A), 174 (3R9D:A), 186 (3R9O:A)                                                                                                                                                                                                                                                                                                                                                                                                                                                                                                                                                                                                                                                                                                                                                                                                                                                                                                                                                                                                                                                                                                                                                                                                                                                                                                                               |
| 9     | 25 (3QRT:A), 54 (3QZT:A), 93 (3QZH:A), 150 (3R8L:A), 158 (3R8P:A), 177 (3R9H:A)                                                                                                                                                                                                                                                                                                                                                                                                                                                                                                                                                                                                                                                                                                                                                                                                                                                                                                                                                                                                                                                                                                                                                                                                                                                                                        |
| 10    | 19 (3QRT:A), 261 (3S00:A)                                                                                                                                                                                                                                                                                                                                                                                                                                                                                                                                                                                                                                                                                                                                                                                                                                                                                                                                                                                                                                                                                                                                                                                                                                                                                                                                              |

Fig. 6. Dataset details for CDK use case. CDK use case resulted in 276 PLI input graphs divided in 11 groups.

| Group | PDB ids                                                                                                                                                                                                                                                                                                                                                                                                                                                                                                                                                                                                                                                                                                                                                                                                                                                                                                                                                                                                                                                                                                                                                                                                                                                                                                                                                                                                                                                                                                                                                                                                                                                                                                                                                                                                                                                                                                                                                                                                                                                                                                                                                                                                                                                                                                                                                                                                                                                                                                                                                                                                                                                                                                                                                                                                                                                                                                                                                                                                                                                                                                                                                                                                                                                                                                                                                                                                                                                                                                                                                                                                                                                                                                                                                                                                         |
|-------|-----------------------------------------------------------------------------------------------------------------------------------------------------------------------------------------------------------------------------------------------------------------------------------------------------------------------------------------------------------------------------------------------------------------------------------------------------------------------------------------------------------------------------------------------------------------------------------------------------------------------------------------------------------------------------------------------------------------------------------------------------------------------------------------------------------------------------------------------------------------------------------------------------------------------------------------------------------------------------------------------------------------------------------------------------------------------------------------------------------------------------------------------------------------------------------------------------------------------------------------------------------------------------------------------------------------------------------------------------------------------------------------------------------------------------------------------------------------------------------------------------------------------------------------------------------------------------------------------------------------------------------------------------------------------------------------------------------------------------------------------------------------------------------------------------------------------------------------------------------------------------------------------------------------------------------------------------------------------------------------------------------------------------------------------------------------------------------------------------------------------------------------------------------------------------------------------------------------------------------------------------------------------------------------------------------------------------------------------------------------------------------------------------------------------------------------------------------------------------------------------------------------------------------------------------------------------------------------------------------------------------------------------------------------------------------------------------------------------------------------------------------------------------------------------------------------------------------------------------------------------------------------------------------------------------------------------------------------------------------------------------------------------------------------------------------------------------------------------------------------------------------------------------------------------------------------------------------------------------------------------------------------------------------------------------------------------------------------------------------------------------------------------------------------------------------------------------------------------------------------------------------------------------------------------------------------------------------------------------------------------------------------------------------------------------------------------------------------------------------------------------------------------------------------------------------------|
| 1     | 1 (1A01:A), 2 (1A01:A), 3 (1A01:A), 4 (1H3E:A), 5 (1H3E:A), 6 (1H3E:A), 7 (1H3E:A), 9 (1LJ0:A), 11 (1LJ0:A), 12 (1LJ0:A), 13 (1LJ0:A), 14 (1LJ0:A), 15 (1QHH:A), 16 (1QHH:A), 17 (1QHH:A), 18 (1TF7:A), 19 (1TF7:A), 20 (1TF7:A), 21 (1TF7:A), 23 (1TF7:A), 24 (1TF7:A), 25 (1TF7:A), 26 (1TF7:A), 27 (1TF7:A), 28 (1TF7:A), 29 (1TF7:A), 30 (1UA2:A), 31 (1UA2:A), 32 (1UA2:A), 33 (1UA2:A), 34 (1Z7E:A), 35 (1Z7E:A), 36 (1Z7E:A), 37 (1Z7E:A), 38 (1Z7E:A), 39 (2CG9:A), 40 (2CG9:A), 41 (2CG9:A), 42 (2CG9:A), 43 (2CG9:A), 44 (2HVV:A), 45 (2HVV:A), 46 (2HVV:A), 47 (2J9L:A), 48 (2J9L:A), 49 (2J9L:A), 50 (2J9L:A), 51 (2J9L:A), 52 (2J9L:A), 53 (2J9L:A), 54 (2J9L:A), 55 (2J9L:A), 56 (2PBZ:A), 57 (2PBZ:A), 58 (2PBZ:A), 59 (2PBZ:A), 60 (2PBZ:A), 61 (2R6G:A), 62 (2R6G:A), 63 (2R6G:A), 64 (2R6G:A), 65 (2R6G:A), 66 (2R6G:A), 68 (2W00:A), 69 (2W00:A), 70 (2W00:A), 71 (2W00:A), 72 (2W00:A), 74 (2YJE:A), 75 (2YJE:A), 76 (2YJE:A), 77 (2YJE:A), 78 (2YJE:A), 79 (3ABT:A), 80 (3ABT:A), 81 (3ABT:A), 82 (3ABT:A), 83 (3ABT:A), 84 (3ABT:A), 85 (3AMT:A), 86 (3AMT:A), 87 (3AMT:A), 88 (3AMT:A), 89 (3AMT:A), 90 (3AMT:A), 91 (3AMT:A), 93 (3BJU:A), 94 (3BJU:A), 95 (3BJU:A), 96 (3BJU:A), 97 (3BJU:A), 98 (3BJU:A), 99 (3BJU:A), 100 (3D2E:A), 101 (3D2E:A), 102 (3D2E:A), 103 (3D2E:A), 104 (3D2E:A), 105 (3D2E:A), 106 (3D2E:A), 107 (3D2E:A), 108 (3D2E:A), 109 (3D2E:A), 110 (3D2E:A), 111 (3E1Y:A), 113 (3EA0:A), 114 (3EA0:A), 115 (3EA0:A), 116 (3EA0:A), 117 (3EA0:A), 118 (3EA0:A), 119 (3EPS:A), 120 (3EPS:A), 121 (3EPS:A), 122 (3EPS:A), 123 (3EPS:A), 125 (3EPS:A), 126 (3EPS:A), 127 (3FKQ:A), 128 (3FKQ:A), 129 (3FKQ:A), 130 (3FKQ:A), 131 (3FKQ:A), 132 (3FKQ:A), 133 (3FVQ:A), 134 (3FVQ:A), 135 (3FVQ:A), 136 (3FVQ:A), 137 (3FVQ:A), 138 (3FVQ:A), 139 (3H1Q:A), 140 (3H1Q:A), 142 (3H1Q:A), 143 (3H1Q:A), 144 (3H1Q:A), 145 (3HGM:A), 146 (3HGM:A), 147 (3HGM:A), 148 (3HGM:A), 149 (3HGM:A), 150 (3HGM:A), 151 (3HGM:A), 152 (3HGM:A), 153 (3INN:A), 154 (3INN:A), 155 (3INN:A), 156 (3INN:A), 157 (3INN:A), 158 (3INN:A), 159 (3J2T:A), 160 (3J2T:A), 161 (3J2T:A), 162 (3J2T:A), 163 (3J2T:A), 165 (3K5H:A), 166 (3K5H:A), 167 (3K5H:A), 168 (3K5H:A), 169 (3K5H:A), 170 (3K5H:A), 171 (3LKK:A), 173 (3LKK:A), 174 (3LKK:A), 175 (3LKK:A), 177 (3LY6:A), 178 (3LY6:A), 179 (3MN7:A), 180 (3MN7:A), 181 (3MN7:A), 182 (3MN7:A), 183 (3MN7:A), 184 (3MN7:A), 185 (3QB0:A), 186 (3QB0:A), 188 (3QB0:A), 189 (3S3T:A), 190 (3S3T:A), 191 (3S3T:A), 192 (3S3T:A), 193 (3S3T:A), 194 (3S3T:A), 195 (3S3T:A), 196 (3S3T:A), 197 (3S3T:A), 198 (3T54:A), 200 (3T54:A), 201 (3T54:A), 202 (3T54:A), 203 (3T54:A), 204 (3T54:A), 205 (3T54:A), 206 (3T54:A), 208 (3VNO:A), 209 (3VNO:A), 210 (3VNO:A), 211 (3VNO:A), 212 (3VNO:A), 213 (3VNO:A), 214 (3VNO:A), 215 (3VNO:A), 216 (3VX4:A), 217 (3VX4:A), 218 (3VX4:A), 219 (3VX4:A), 220 (3VX4:A), 221 (3VX4:A), 223 (3WBZ:A), 224 (3WBZ:A), 226 (3WBZ:A), 227 (3WBZ:A), 228 (3WBZ:A), 229 (3WBZ:A), 231 (3ZCT:A), 232 (3ZCT:A), 233 (3ZCT:A), 234 (3ZCT:A), 235 (3ZCT:A), 236 (3ZCT:A), 237 (3ZCN:A), 238 (3ZCN:A), 239 (3ZCN:A), 240 (3ZCN:A), 241 (3ZCN:A), 242 (3ZCN:A), 243 (3ZCN:A), 244 (3ZCN:A), 245 (3ZCN:A), 246 (3ZCN:A), 247 (3ZCN:A), 248 (3ZCN:A), 250 (4A16:A), 251 (4A16:A), 252 (4A16:A), 253 (4A16:A), 254 (4B1Z:A), 256 (4B1Z:A), 257 (4B1Z:A), 258 (4B1Z:A), 259 (4B1Z:A), 260 (4B1Z:A), 262 (4B1Z:A), 264 (4DIN:A), 265 (4DIN:A), 266 (4DIN:A), 267 (4DIN:A), 268 (4DIN:A), 269 (4DXL:A), 270 (4DXL:A), 271 (4DXL:A), 272 (4DXL:A), 273 (4DXL:A), 274 (4DXL:A), 275 (4EJ7:A), 277 (4EJ7:A), 278 (4EJ7:A), 279 (4EJ7:A), 280 (4EJ7:A), 281 (4EJ7:A), 282 (4EJ7:A), 283 (4EJ7:A), 284 (4EJ7:A), 285 (4GXQ:A), 286 (4GXQ:A), 287 (4GXQ:A), 288 (4GXQ:A), 289 (4GXQ:A), 290 (4GXQ:A), 291 (4GXQ:A), 292 (4GXQ:A) |
| 2     | 0 (1A01:A), 8 (1H3E:A), 10 (1LJ0:A), 22 (1TF7:A), 54 (2J9L:A), 55 (2PBZ:A), 67 (2W00:A), 73 (2WPD:A), 92 (3BJU:A), 112 (3EA0:A), 124 (3EPS:A), 141 (3H1Q:A), 164 (3K5H:A), 172 (3LKK:A), 176 (3LY6:A), 187 (3QB0:A), 199 (3T54:A), 207 (3VNO:A), 222 (3WBZ:A), 225 (3WBZ:A), 230 (3ZCT:A), 249 (4A16:A), 255 (4B1Z:A), 261 (4B1Z:A), 263 (4DIN:A), 276 (4EJ7:A)                                                                                                                                                                                                                                                                                                                                                                                                                                                                                                                                                                                                                                                                                                                                                                                                                                                                                                                                                                                                                                                                                                                                                                                                                                                                                                                                                                                                                                                                                                                                                                                                                                                                                                                                                                                                                                                                                                                                                                                                                                                                                                                                                                                                                                                                                                                                                                                                                                                                                                                                                                                                                                                                                                                                                                                                                                                                                                                                                                                                                                                                                                                                                                                                                                                                                                                                                                                                                                                 |

Fig. 7. Dataset details for ATP use case. ATP use case resulted in 293 PLI input graphs divided in 2 groups.

**Table 2.** PDB ids of datasets used - Results and discussion

| Datasets | Number of complexes | Complexes                                                                                                                                                                                                                                                                                                                                                                                                                                                                                                                                                                                              |
|----------|---------------------|--------------------------------------------------------------------------------------------------------------------------------------------------------------------------------------------------------------------------------------------------------------------------------------------------------------------------------------------------------------------------------------------------------------------------------------------------------------------------------------------------------------------------------------------------------------------------------------------------------|
| ATP      | 50                  | 1A0I.A, 4EJ7.A, 2R6G.A, 3ZIA.A, 2CG9.A, 3LKK.A, 3HGM.A, 4GXQ.A, 1TF7.A, 2J9L.A, 2W00.A, 3FKQ.A, 3DWL.A, 3FVQ.A, 3VX4.A, 3T54.A, 3EPS.A, 3D2E.A, 3WBZ.A, 3ZCN.A, 3INN.A, 1UA2.A, 2YJE.A, 4BJR.B, 1H3E.A, 4DXL.A, 3J2T.A, 3MN7.A, 2WPD.A, 1JI0.A, 4J7C.A, 4A16.A, 2PBZ.A, 3K5H.A, 3H1Q.A, 3VNQ.A, 3A8T.A, 1Z7E.A, 3ZC7.A, 4DIN.A, 2HVY.A, 4B1Z.A, 3QB0.A, 2JJX.A, 3S3T.A, 3BJU.A, 3AMT.A, 3EA0.A, 1QHH.A, 3LY6.A                                                                                                                                                                                         |
| CDK      | 73                  | 3QL8.A, 3QQF.A, 3QQG.A, 3QQH.A, 3QQI.A, 3QQK.A, 3QQL.A, 3QRT.A, 3QRU.A, 3QTQ.A, 3QTR.A, 3QTS.A, 3QTU.A, 3QTW.A, 3QTX.A, 3QTZ.A, 3QU0.A, 3QWJ.A, 3QWK.A, 3QX2.A, 3QX4.A, 3QXO.A, 3QXP.A, 3QZF.A, 3QZG.A, 3QZH.A, 3QZI.A, 3R1Q.A, 3R1S.A, 3R1Y.A, 3R28.A, 3R6X.A, 3R71.A, 3R73.A, 3R7E.A, 3R7I.A, 3R7U.A, 3R7V.A, 3R7Y.A, 3R83.A, 3R8L.A, 3R8M.A, 3R8P.A, 3R8U.A, 3R8V.A, 3R8Z.A, 3R9D.A, 3R9H.A, 3R9N.A, 3R9O.A, 3RAH.A, 3RAI.A, 3RAK.A, 3RAL.A, 3RJC.A, 3RK5.A, 3RK7.A, 3RK9.A, 3RKB.A, 3RM6.A, 3RM7.A, 3RMF.A, 3RNI.A, 3ROY.A, 3RPO.A, 3RPR.A, 3RPV.A, 3RPY.A, 3RZB.A, 3S00.A, 3S0O.A, 3S1H.A, 3SQQ.A |

**Table 3.** Number of interactions established by protein and ligand atoms from ATP dataset - Results and discussion

| <b>3-node-pattern</b> |                        |
|-----------------------|------------------------|
| Ligand atom           | Number of interactions |
| O1G                   | 18                     |
| O1B                   | 9                      |
| O2G                   | 8                      |
| O1A                   | 8                      |
| O2B                   | 8                      |
| O2A                   | 1                      |
| Residue atom          | Number of interactions |
| LYS NZ                | 19                     |
| ARG NH2               | 18                     |
| ARG NH1               | 9                      |
| ARG NE                | 6                      |
| <b>2-node-pattern</b> |                        |
| Ligand atom           | Number of interactions |
| O1G                   | 20                     |
| O2B                   | 14                     |
| O1A                   | 11                     |
| O2G                   | 7                      |
| O1B                   | 6                      |
| O2A                   | 6                      |
| Residue atom          | Number of interactions |
| ASP OD1               | 20                     |
| ASP OD2               | 18                     |
| GLU OE2               | 13                     |
| GLU OE1               | 12                     |
| GLU OD2               | 1                      |
